# Supplementary material for: A landscape of X-inactivation during human T cell development
Source: PubMed Central journal article supplement (PMC11618795; doi:10.1038/s41467-024-54110-7), 2024-12-04
Supplement: 41467_2024_54110_MOESM1_ESM.pdf [file 41467_2024_54110_MOESM1_ESM.pdf]

# Supplementary Information

## A landscape of X-inactivation during human T cell development

**Authors:** Björn Gylemo<sup>1,\*</sup>, Maike Bensberg<sup>1,\*</sup>, Viktoria Hennings<sup>2,3,\*</sup>, Christina Lundqvist<sup>2,\*</sup>, Alessandro Camponeschi<sup>2</sup>, Dóra Goldmann<sup>1</sup>, Huan Zhang<sup>1</sup>, Aida Selimović<sup>1</sup>, Antonio Lentini<sup>1,†</sup>, Olov Ekwall<sup>2,3,†</sup>, Colm E. Nestor<sup>1,†</sup>

### Affiliations:

<sup>1</sup>Crown Princess Victoria Children's Hospital, and Department of Biomedical and Clinical Sciences (BKV), Linköping University, Linköping, Sweden.

<sup>2</sup>Department of Rheumatology and Inflammation Research, Institute of Medicine, The Sahlgrenska Academy, University of Gothenburg, Gothenburg, Sweden.

<sup>3</sup>Department of Pediatrics, Institute of Clinical Sciences, The Sahlgrenska Academy, University of Gothenburg, Gothenburg, Sweden.

\*These authors contributed equally: Björn Gylemo, Maike Bensberg, Viktoria Hennings, Christina Lundqvist

† These authors jointly supervised this work: Antonio Lentini, Olov Ekwall, Colm E. Nestor

Correspondence to: [colm.nestor@liu.se](mailto:colm.nestor@liu.se)

### Table of contents:

Supplementary Figures 1 – 8

Supplementary Tables 1 – 6

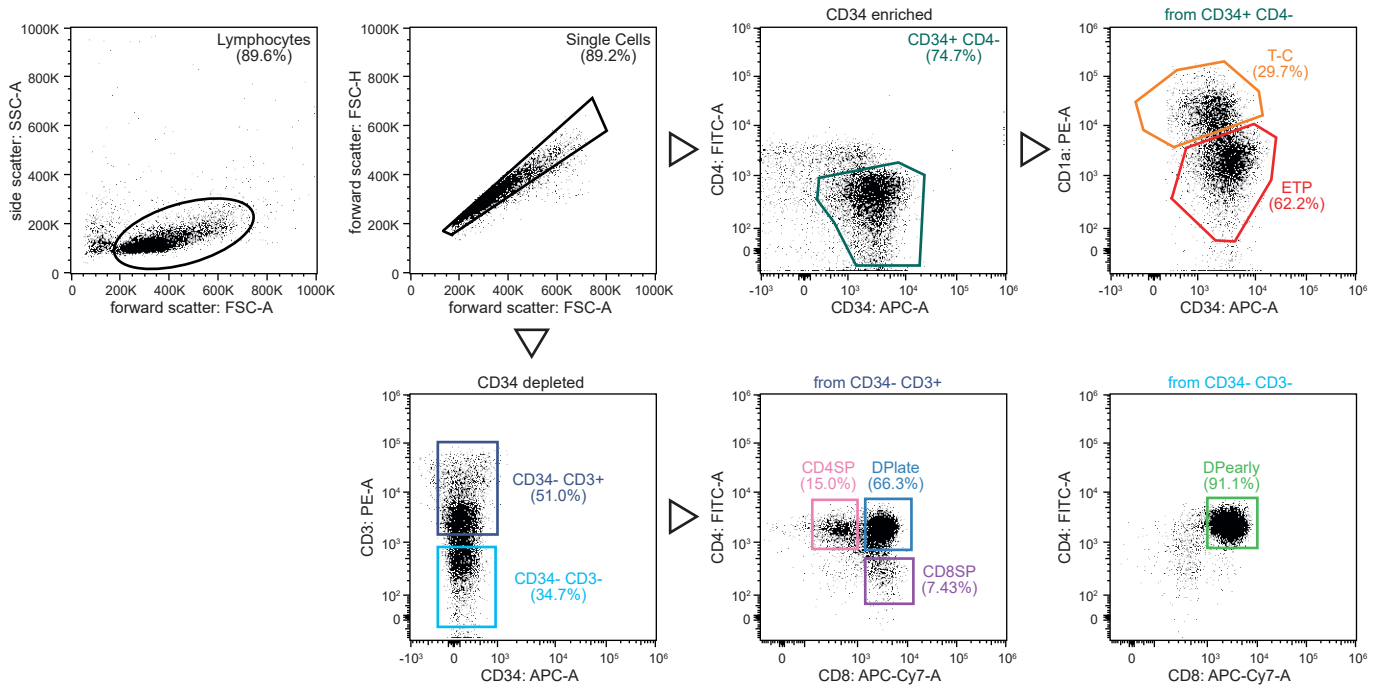

**Supplementary Figure 1: Thymocyte sorting.** FACS sorting strategy for isolation of primary human thymocytes. ETP, early T-cell progenitors (CD34+, CD1a-, CD4-); T-C, T-cell committed thymocytes (CD34+, CD1a+, CD4-); DPearly, early double positive thymocytes (CD34-, CD3-, CD4+, CD8+); DPlate, late double positive thymocytes (CD34-, CD3+, CD4+, CD8+); CD4SP, CD4 single positive thymocytes (CD34-, CD3+, CD4+, CD8-); CD8SP, CD8 single positive thymocytes (CD34-, CD3+, CD4-, CD8+). Antibodies used are listed in Supplementary Table 4. Source data are provided as a Source Data file.

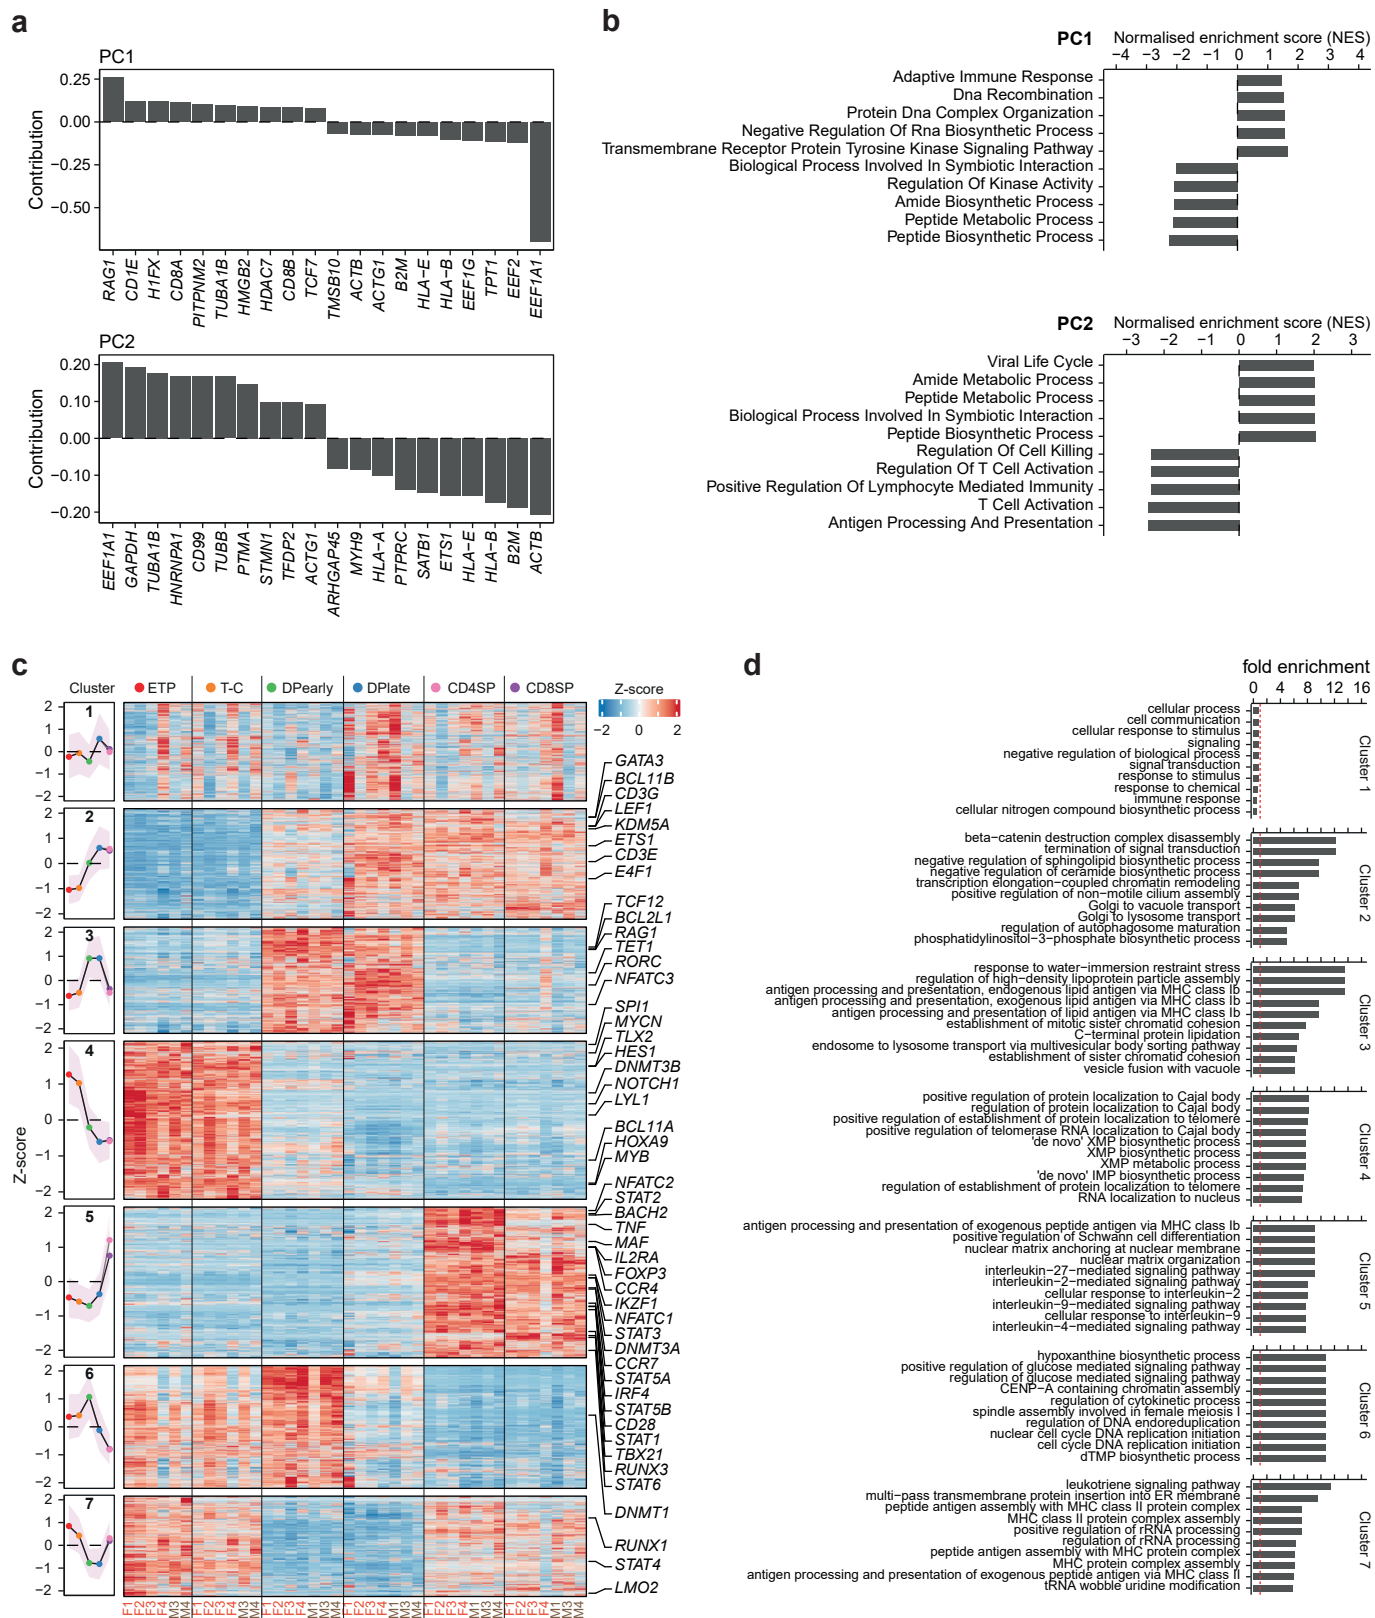

**Supplementary Figure 2: Expression dynamics during human thymocyte development.** **a**, Top 20 genes contributing to principal component 1 (PC1) (top) and PC2 (bottom) in Fig. 1b. **b**, Normalized enrichment score of gene set enrichment analysis on PC1 and PC2 in Fig. 1b. **c**, Expression heatmap of 7 temporal gene clusters that show dynamic expression throughout thymocyte development. **d**, Panther GO enrichment analysis on the temporal clusters in panel **c**.  $n = 6$  biological replicates for each thymocyte subpopulation (3 females and 3 males). Source data are provided as a Source Data file.

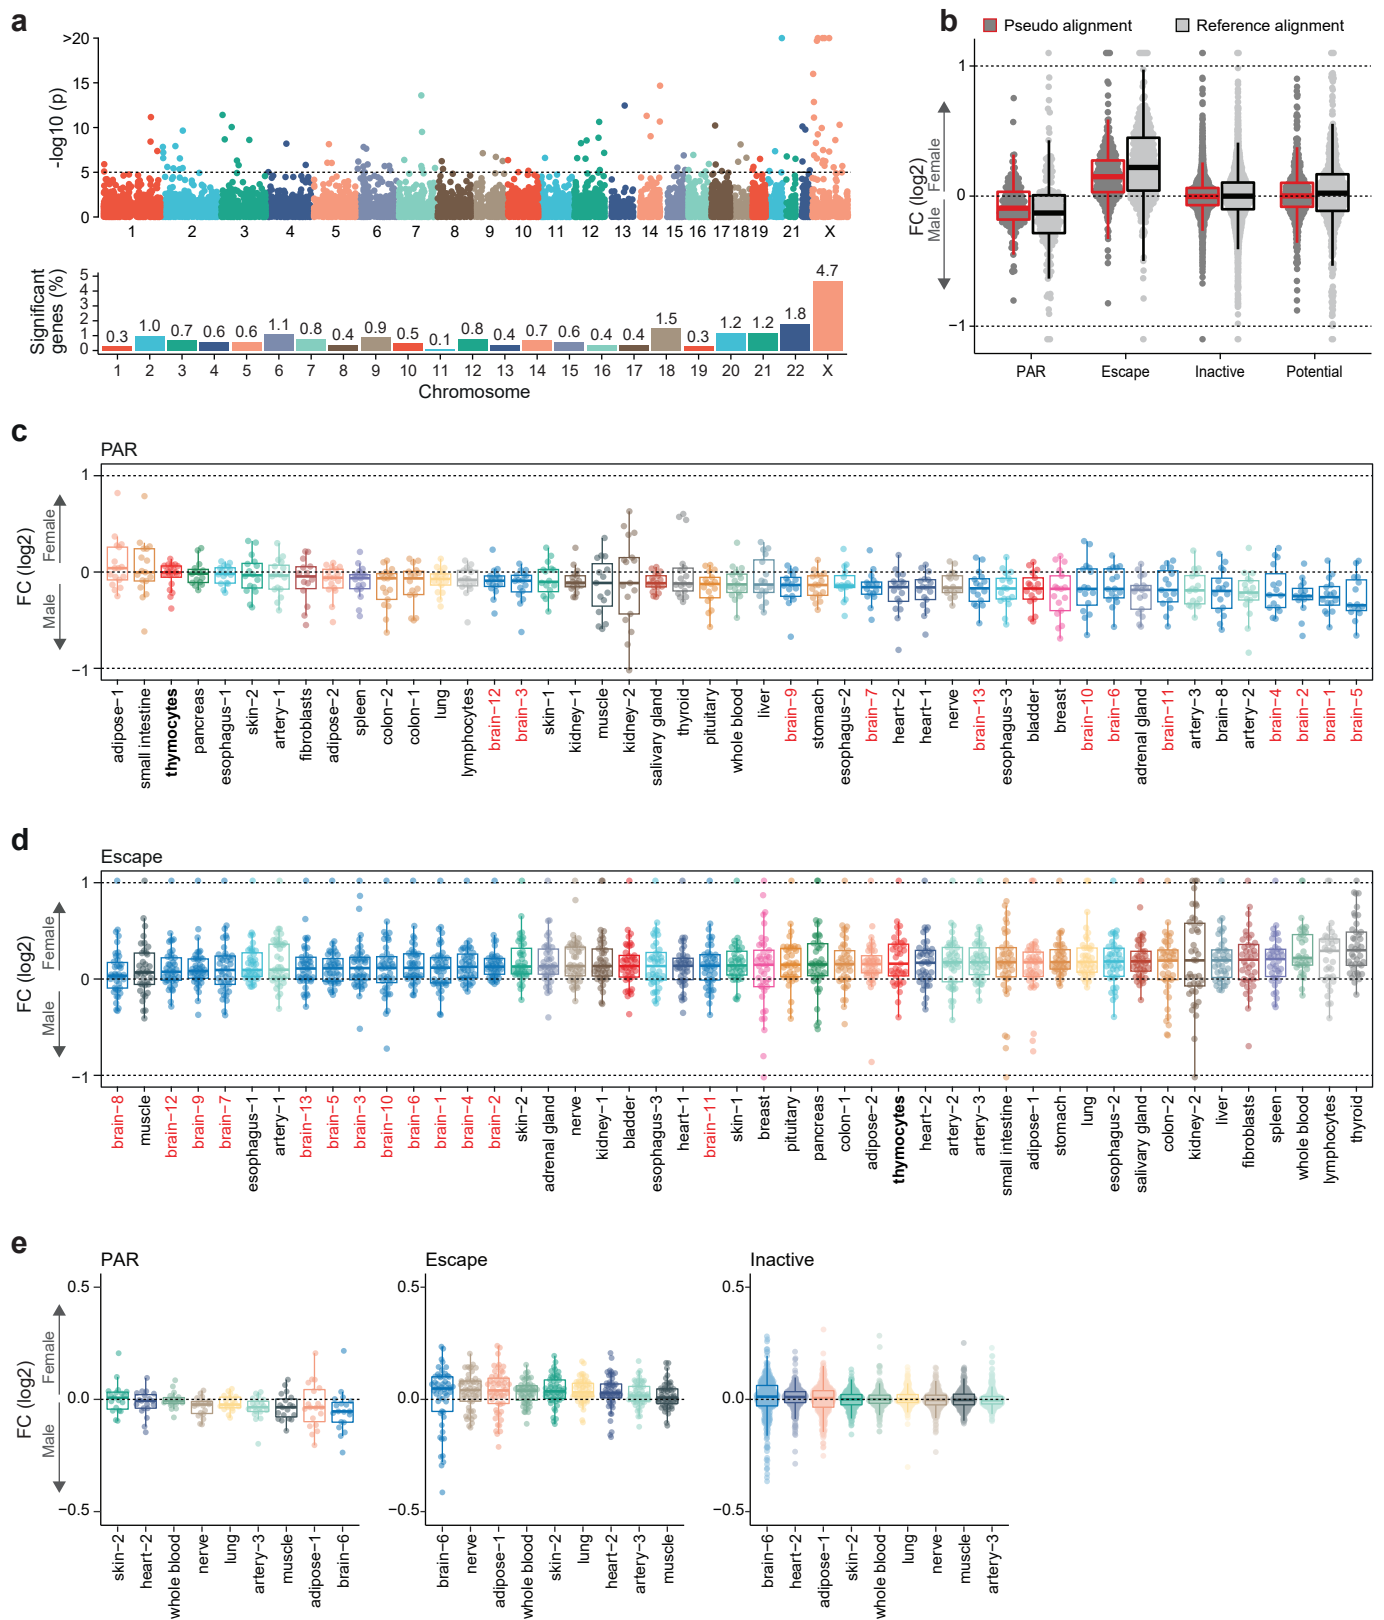

**Supplementary Figure 3: Sex biased expression in human primary tissues.** **a**, Significance values ( $-\log_{10}(P)$ ) from a two-tailed Wald test of sex-biased gene expression across all expressed genes and all chromosomes except chromosome Y (top) and proportion of significant sex-biased genes for each chromosome except chromosome Y (bottom). Combination of six thymocyte subpopulations for  $n = 6$  biological replicates (3 females and 3 males). **b**, Sex-biased expression as  $\log_2$  of fold change (FC) female over male of gene expression in PAR (pseudoautosomal region), escape, inactive and potential escape genes when aligned using a pseudo alignment or a reference alignment approach. See methods for details. **c,d**, PAR (**c**) and escape (**d**) gene expression sex-bias in 47 tissues from GTEx. **e**, Sex-bias across PAR, escape and inactive genes in Affymetrix GTEx data. **b,c,d,e**, Boxplot representing median (central line),

first and third quartiles (Q1 and Q3, respectively) (box edges) and 1.5\*inter quartile range (IQR) from Q1 and Q3 (whiskers). **c,d,e** n = 20 (10 male and 10 female for each tissue). See Supplementary Table 3 for a complete list of tissue abbreviations and sample counts. Source data are provided as a Source Data file.

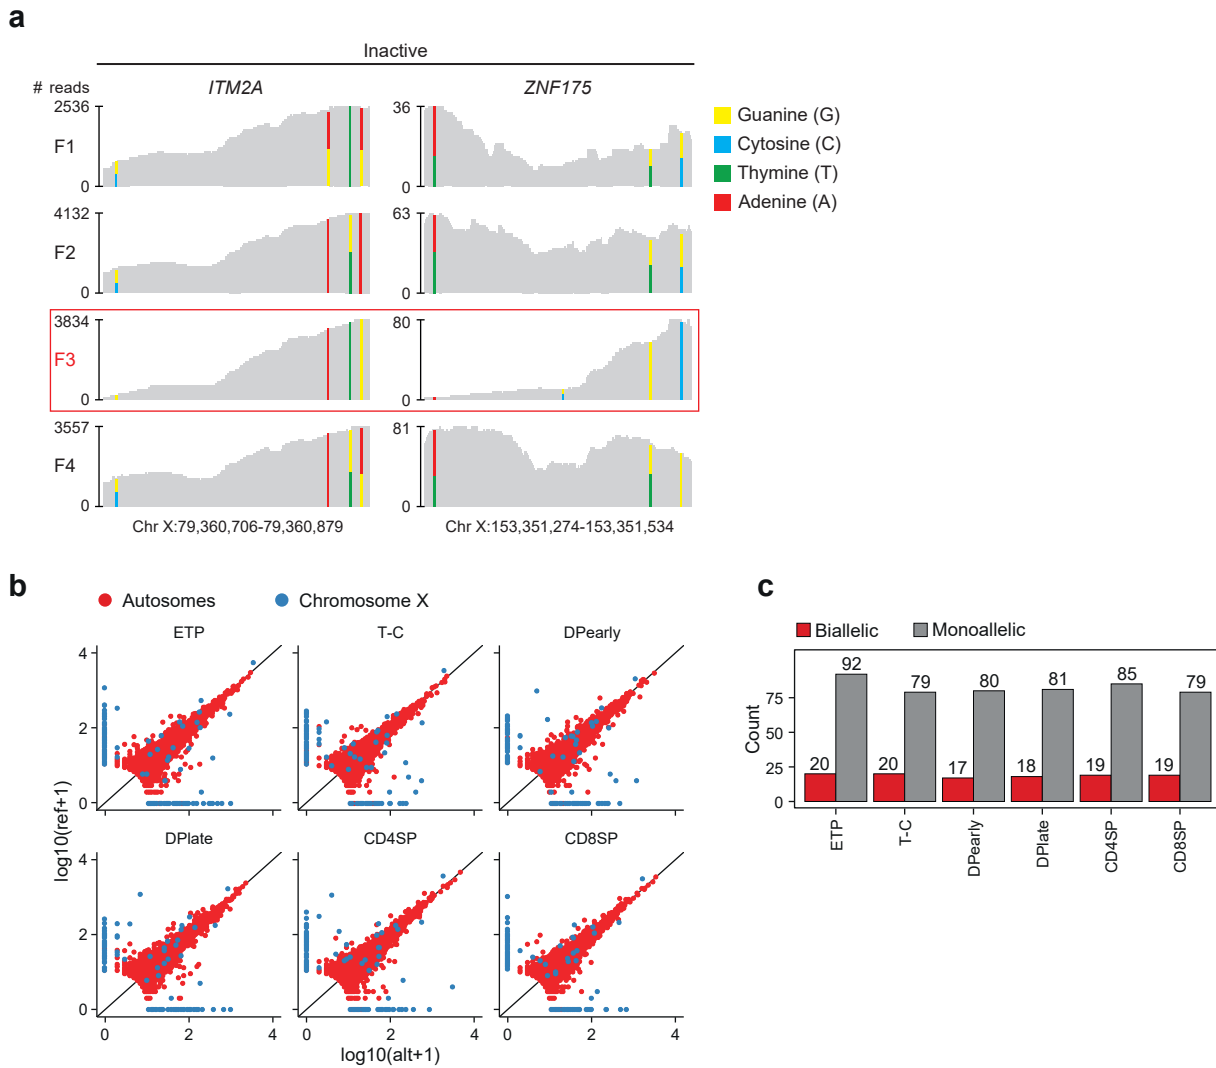

**Supplementary Figure 4: Identification of a female with completely skewed XCI.** **a**, RNA-seq read counts of inactive X-chromosome genes *ITM2A* and *ZNF175* in females F1-F4. Heterozygous single nucleotide polymorphisms are indicated as colored bars (G: yellow, C: blue, T: green, A: red). **b**, Allele-specific expression (ASE) of genes on autosomes (red) and on the X-chromosome (blue) in thymocyte subpopulations in F3. **c**, Number of biallelic and monoallelic genes on chromosome X per thymocyte subpopulation in F3. Source data are provided as a Source Data file.



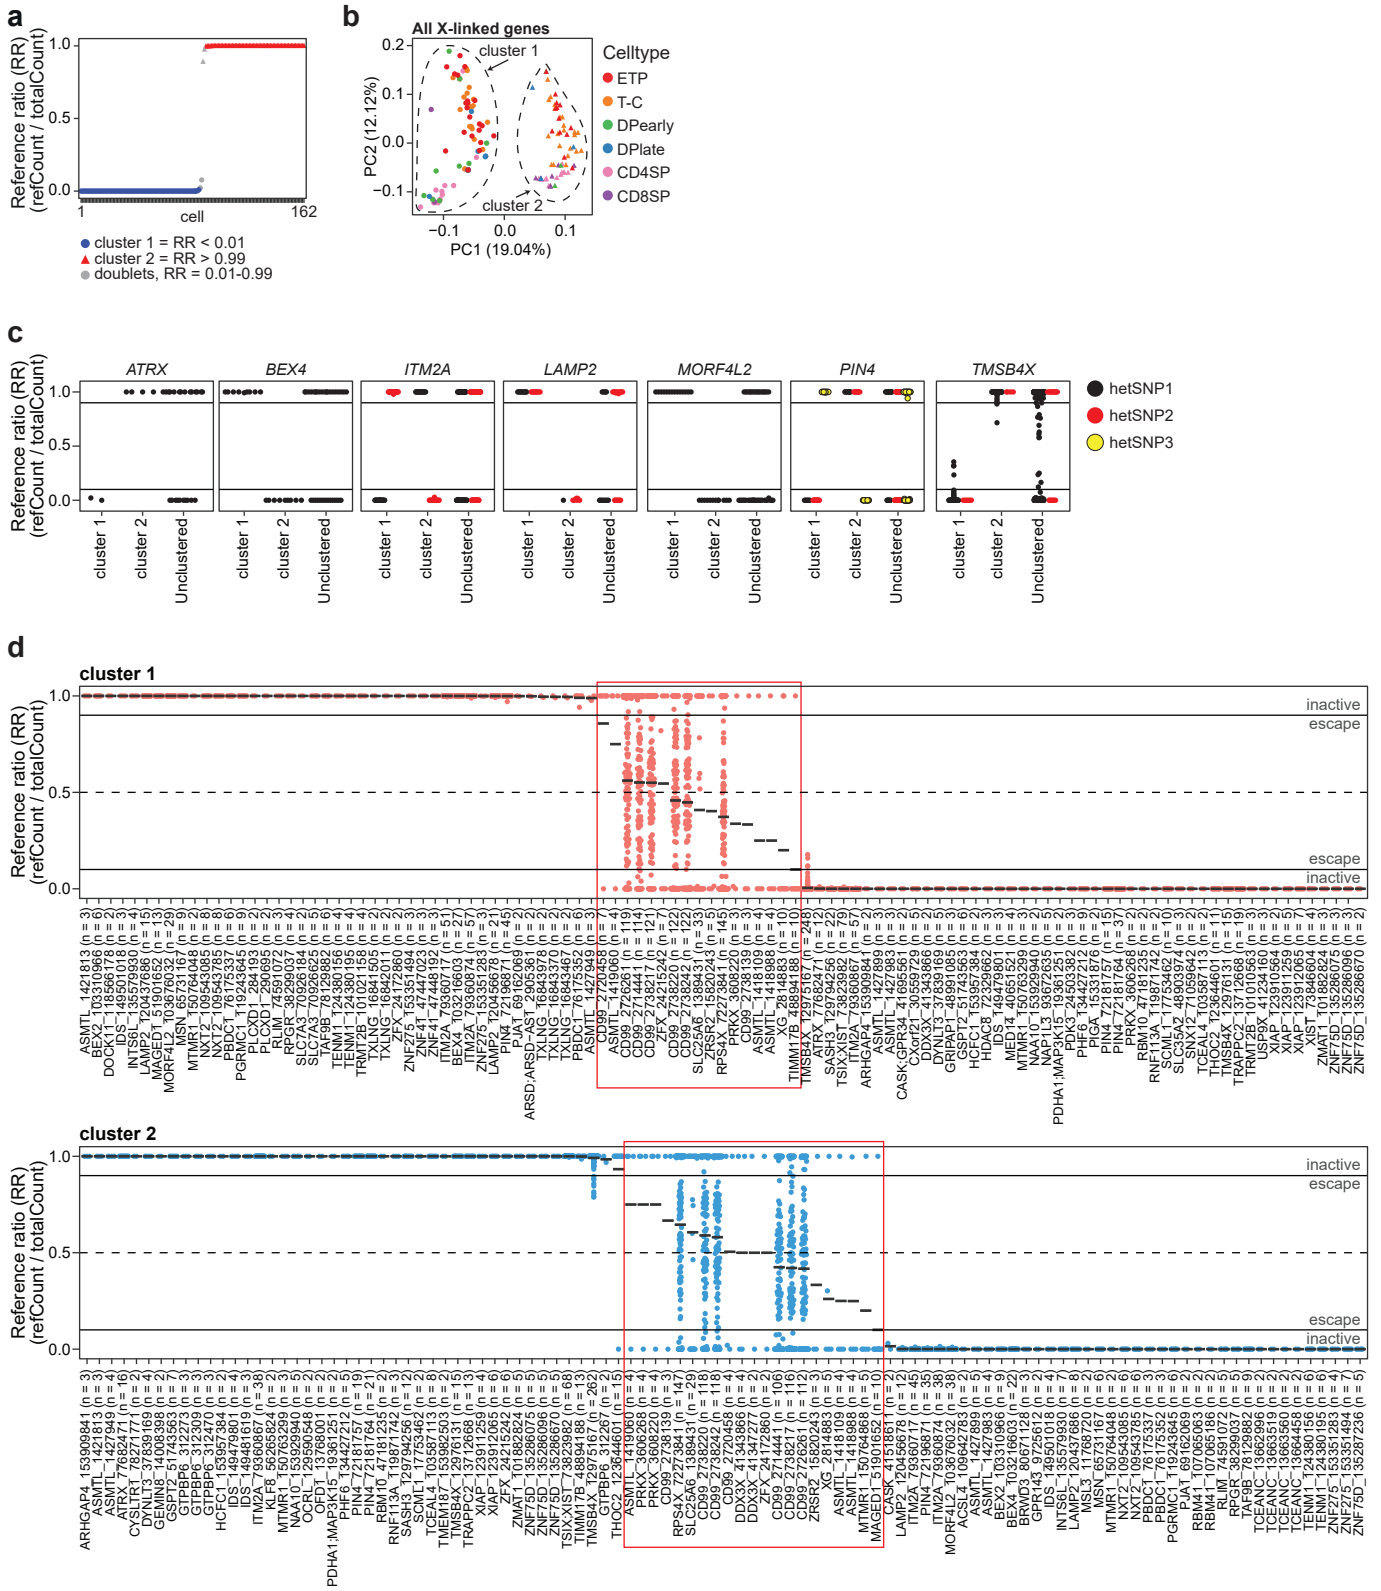

**Supplementary Figure 6: Single cell sequencing of primary human thymocyte populations.** Single cell sequencing (Smart-seq2) for sorted thymocyte subpopulations from one female sample, F4. **a**, Reference ratio (RR) (reference count / total read count) of XIST per cell. Cells with XIST RR < 0.01 were assigned to cluster 1, cells with an XIST RR > 0.99 assigned to cluster 2. Cells with an XIST RR between 0.01 and 0.09 were classified as doublets. **b**, Principal component (PC) analysis on the RR of all X-linked genes with detected XIST allele-specific expression. ETP, early T-cell progenitors; T-C, T-cell committed thymocytes; D Pearly, early double positive thymocytes; D Plate, late double positive thymocytes; CD4SP, CD4 single positive thymocytes; CD8SP, CD8 single positive thymocytes **c**, RR of genes with a consistent allelic expression per cell assigned into clusters based on panel **a,b** (cluster 1 or cluster 2) and cells without detected XIST allele-specific expression (unclassified). Genes with several heterozygous SNPs



colored in black, red or yellow. **d**, RR from single cells pooled based on clusters identified in panels. Black lines indicate mean RR per gene and cluster. **a,b,c**. Escape genes (reference ratio: 0.1 – 0.9) highlighted in red box. n, number of cells expressing the SNP. Numbers after gene symbols are the genomic position of the heterozygous SNP. Source data are provided as a Source Data file.

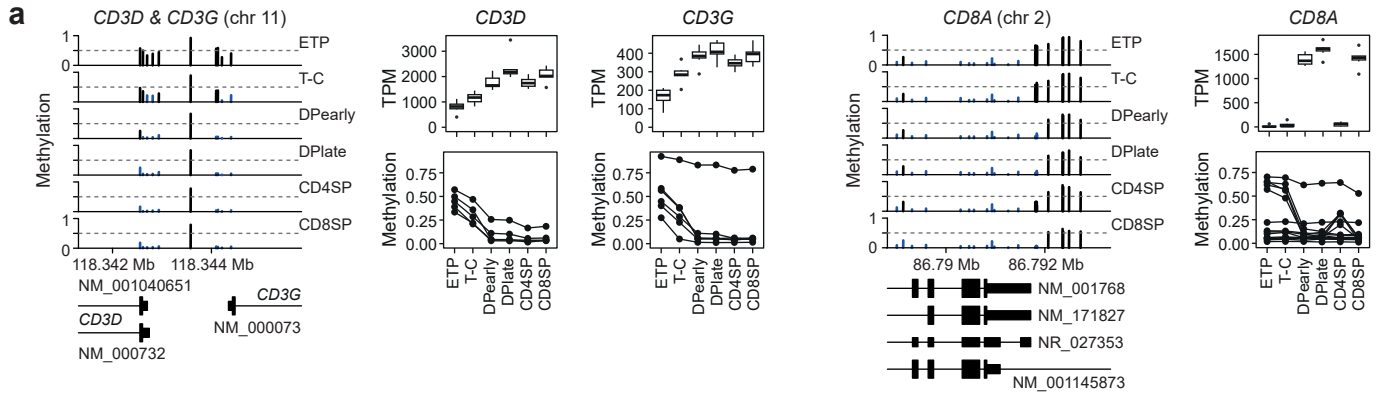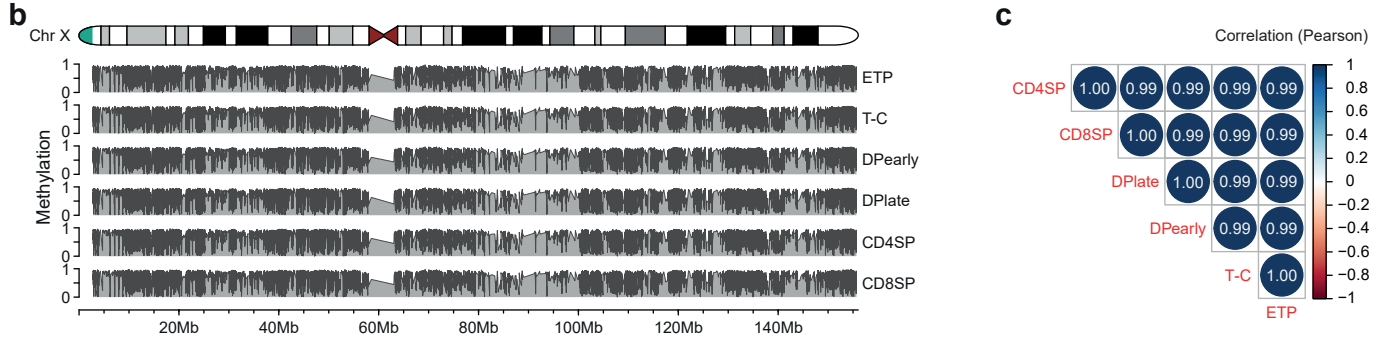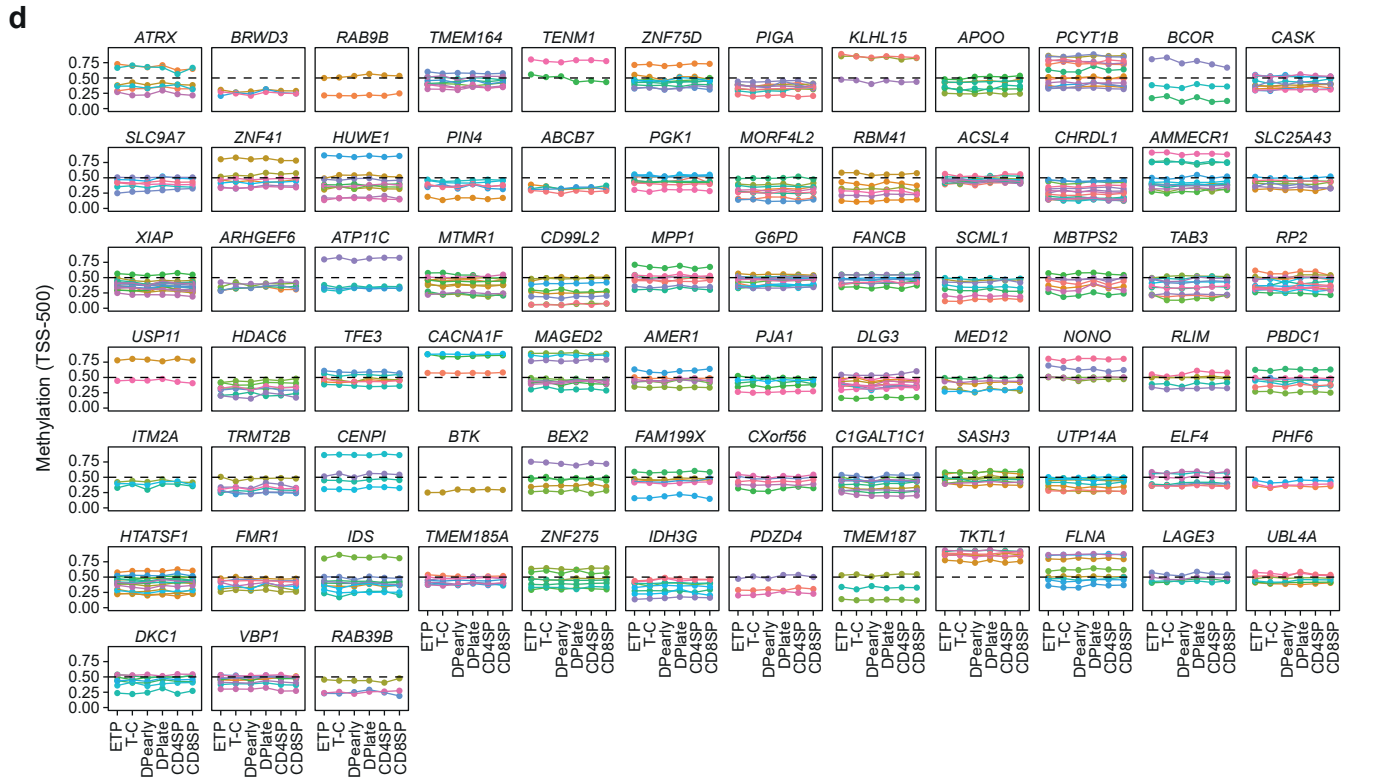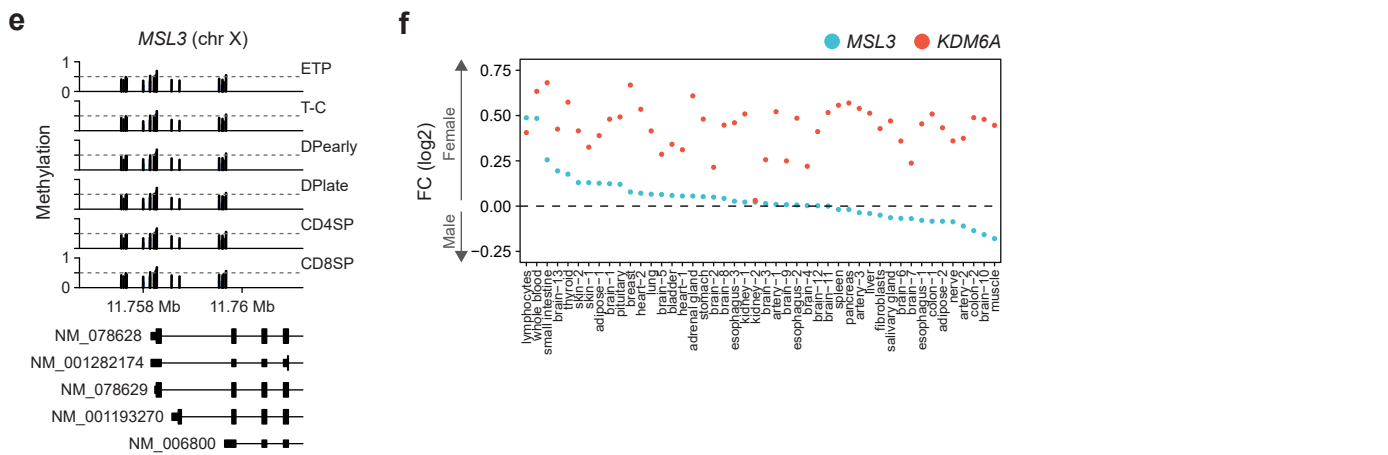

**Supplementary Figure 7: DNA methylation dynamics during human thymocyte development.** **a**, DNA methylation around CD3D/CD3G and CD8A transcription start sites (TSS) (left), gene expression as transcript per million (TPM) (top) and DNA methylation of probes -500 and +1500 (bottom) in each thymocyte subpopulation. **b**, Stable X-chromosome DNA methylation across thymocyte subpopulations. **c**, Pearson correlation scores of X-chromosome methylation between thymocyte subpopulations. **d**, DNA methylation at TSS -500 of genes found to be inactive in both thymocytes and previous assessments across thymocyte development. Distinct colours for each probe from EPIC methylation array. **e**, DNA methylation of MSL3 at the TSS. **f**, Sex-biased expression as log<sub>2</sub> fold change (FC) of expression in females over males of MSL3 and KDM6A across 46 GTEx tissues (n = 20; 10 male and 10 female for each tissue). **a,b,c,d**, n = 3 biological replicates (all female). Source data are provided as a Source Data file.

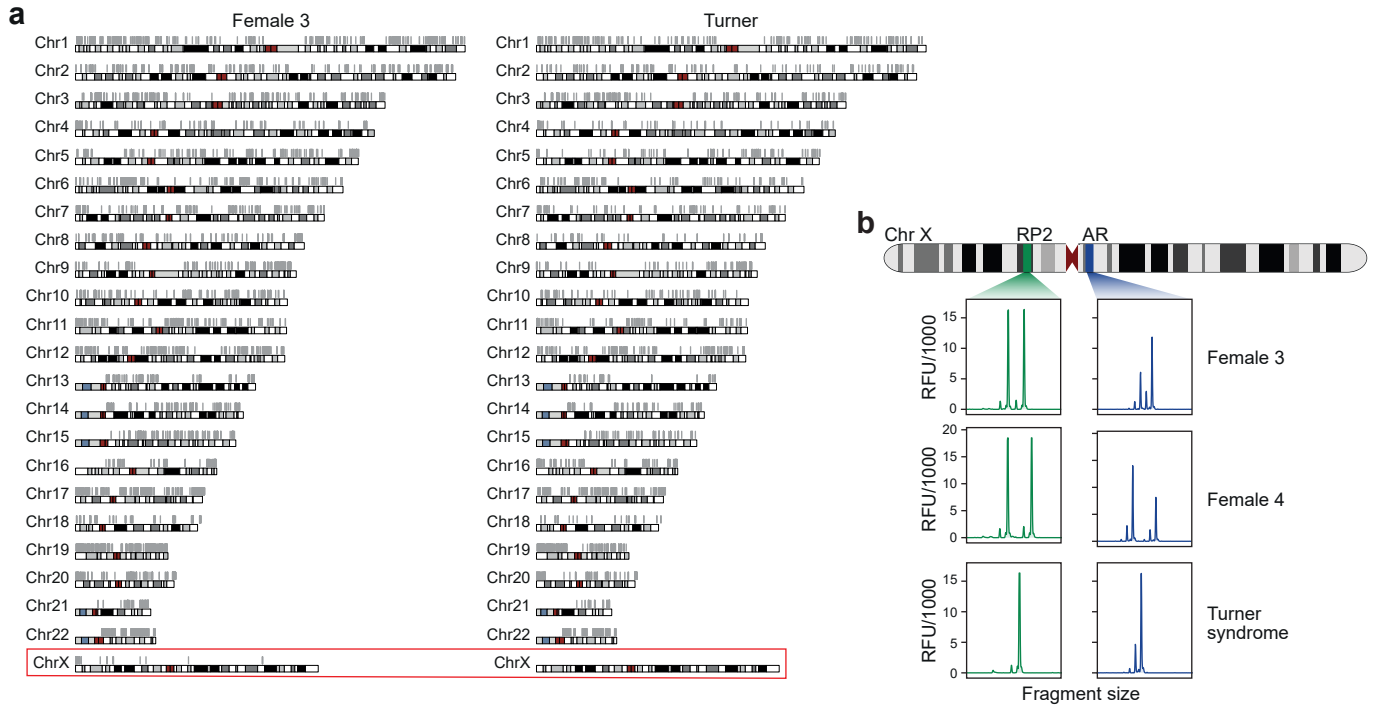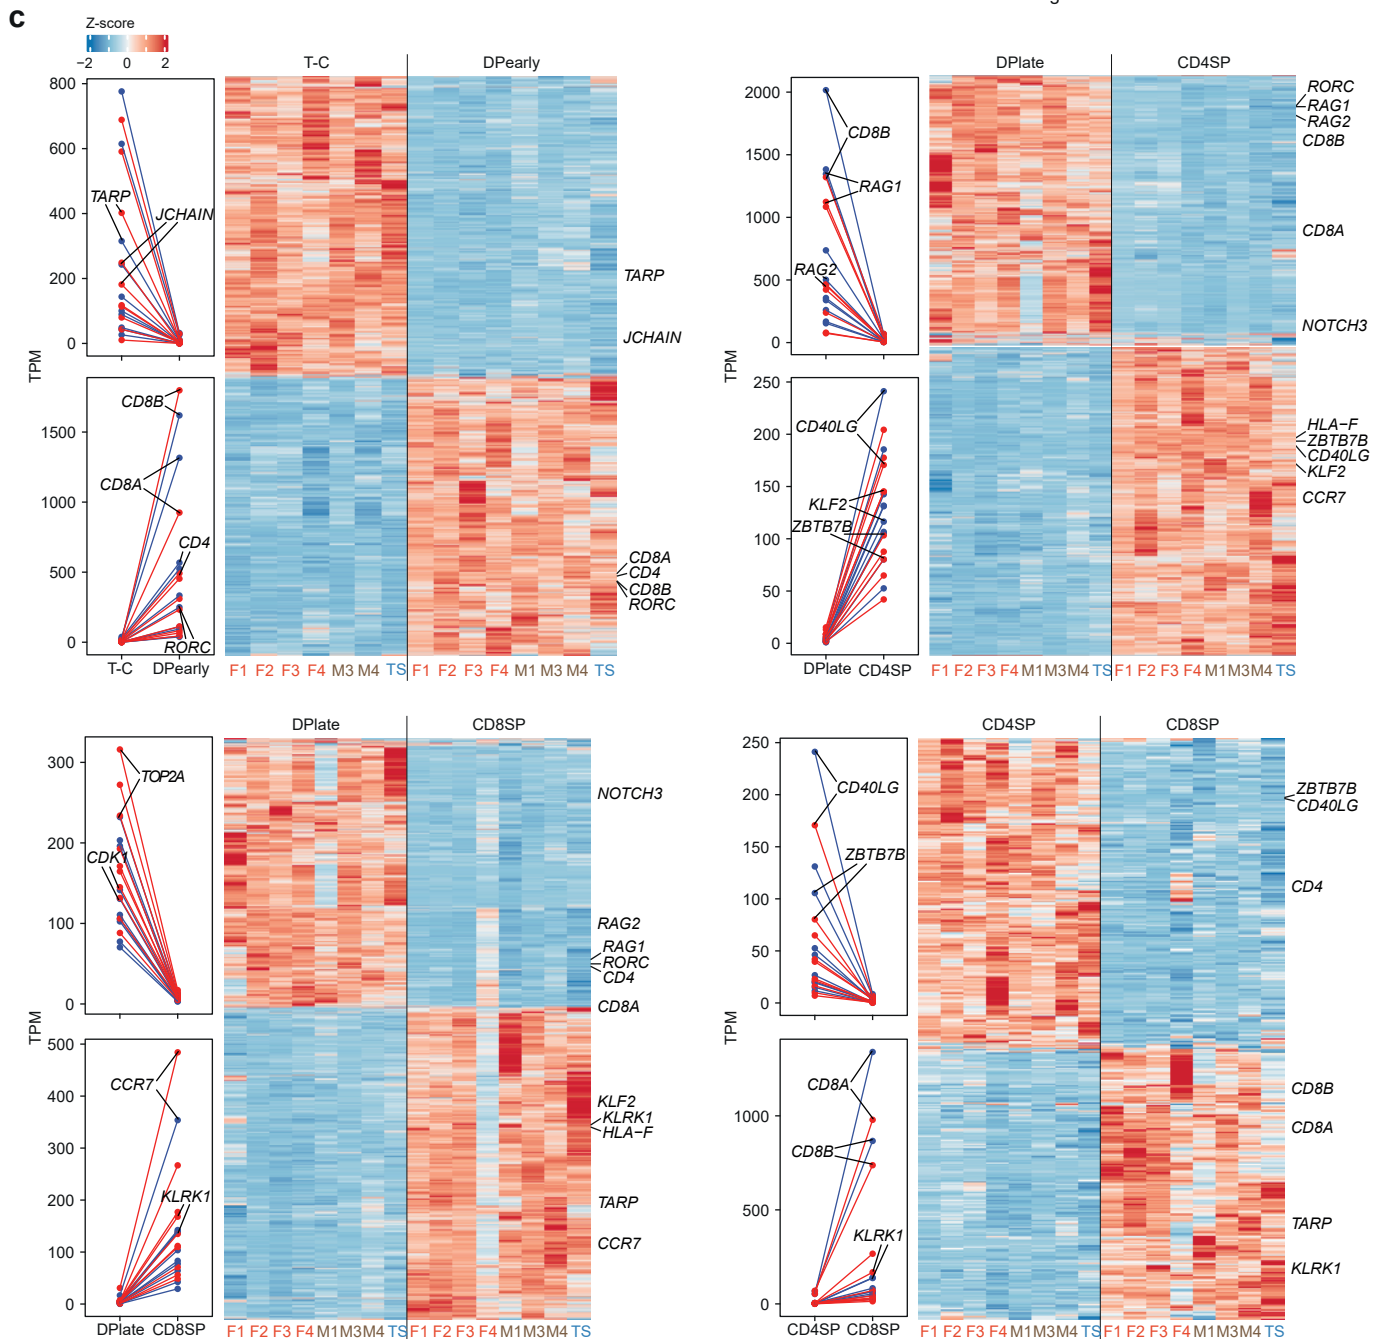

**Supplementary Figure 8: Primary human thymocytes in Turner syndrome.** **a**, Heterozygous SNPs identified in Female 3 (F3) and Turner Syndrome (TS) sample RNA-seq of CD4 single positive (CD4SP) cells. **b**, Repeat length of two polymorphic repeat loci in F3, F4 and the TS sample. **c**, Gene expression of transition genes, including the significant (Wald Test P-value <  $1 \times 10^{-3}$ ) genes with the highest fold change ( $\log_2$ ) values between T-cell committed thymocytes (T-C) vs early double positive thymocytes (DPearly) (top left), late double positive thymocytes (DPlate) vs CD4SP (top right), DPlate vs CD8 single positive thymocytes (CD8SP) (bottom left) and CD4SP vs CD8SP (bottom right). Change in expression shown as transcript per million (TPM) for XX (n = 4) and XY (n = 3) karyotype (mean of all 7 samples; red) and TS (blue, n = 1) sample (line plot) and Z-score heatmap. Source data are provided as a Source Data file.

| Short ID | Patient         | Bulk RNA-seq | WES | EPIC array | Smart-seq2 | qPCR | Note |
|----------|-----------------|--------------|-----|------------|------------|------|------|
| M1       | Male 1          | X            |     |            |            | X    |      |
| M2       | Male 2          |              |     |            |            | X    |      |
| M3       | Male 3          | X            |     |            |            | X    |      |
| M4       | Male 4          | X            |     |            |            |      |      |
| F1       | Female 1        | X            | X   | X          |            | X    |      |
| F2       | Female 2        | X            | X   |            |            | X    |      |
| F3       | Female 3        | X            | X   | X          |            | X    | cXCI |
| F4       | Female 4        | X            | X   | X          | X          |      |      |
| TS       | Turner Syndrome | X            |     |            |            |      |      |

**Supplementary Table 1:** Sample overview.

| Short ID | Patient         | Cell type | Number sorted cells | Number reads RNA-seq (million) | Number reads WES (million) | Number cells passing filter Smart-seq2 | Mean Number reads Smart-seq2 |
|----------|-----------------|-----------|---------------------|--------------------------------|----------------------------|----------------------------------------|------------------------------|
| M3       | Male 3          | ETP       | 1500000             | 49                             |                            |                                        |                              |
| M4       | Male 4          | ETP       | 1000000             | 54                             |                            |                                        |                              |
| F1       | Female 1        | ETP       | 200000              | 44                             |                            |                                        |                              |
| F2       | Female 2        | ETP       | 560000              | 39                             |                            |                                        |                              |
| F3       | Female 3        | ETP       | 385000              | 66                             |                            |                                        |                              |
| F4       | Female 4        | ETP       | 1000000             | 62                             |                            | 85                                     | 391844.941                   |
| TS       | Turner Syndrome | ETP       | 270000              | 54                             |                            |                                        |                              |
| M3       | Male 3          | T-C       | 850000              | 53                             |                            |                                        |                              |
| M4       | Male 4          | T-C       | 300000              | 54                             |                            |                                        |                              |
| F1       | Female 1        | T-C       | 300000              | 59                             |                            |                                        |                              |
| F2       | Female 2        | T-C       | 1000000             | 35                             |                            |                                        |                              |
| F3       | Female 3        | T-C       | 338000              | 43                             |                            |                                        |                              |
| F4       | Female 4        | T-C       | 650000              | 61                             |                            | 84                                     | 365782.226                   |
| TS       | Turner Syndrome | T-C       | 600000              | 62                             |                            |                                        |                              |
| M1       | Male 1          | DPearly   | 1000000             | 49                             |                            |                                        |                              |
| M3       | Male 3          | DPearly   | 1000000             | 42                             |                            |                                        |                              |
| M4       | Male 4          | DPearly   | 1000000             | 50                             |                            |                                        |                              |
| F1       | Female 1        | DPearly   | 2000000             | 48                             |                            |                                        |                              |
| F2       | Female 2        | DPearly   | 1000000             | 42                             |                            |                                        |                              |
| F3       | Female 3        | DPearly   | 1000000             | 46                             |                            |                                        |                              |
| F4       | Female 4        | DPearly   | 1000000             | 64                             |                            | 84                                     | 377234.25                    |
| TS       | Turner Syndrome | DPearly   | 1300000             | 53                             |                            |                                        |                              |
| M1       | Male 1          | DPlate    | 1000000             | 45                             |                            |                                        |                              |
| M3       | Male 3          | DPlate    | 1000000             | 39                             |                            |                                        |                              |
| M4       | Male 4          | DPlate    | 1000000             | 53                             |                            |                                        |                              |
| F1       | Female 1        | DPlate    | 2000000             | 54                             |                            |                                        |                              |
| F2       | Female 2        | DPlate    | 1000000             | 45                             |                            |                                        |                              |
| F3       | Female 3        | DPlate    | 1000000             | 44                             |                            |                                        |                              |
| F4       | Female 4        | DPlate    | 1000000             | 64                             | 127                        | 72                                     | 490057.181                   |
| TS       | Turner Syndrome | DPlate    | 1200000             | 54                             |                            |                                        |                              |
| M1       | Male 1          | CD4SP     | 1000000             | 50                             |                            |                                        |                              |
| M3       | Male 3          | CD4SP     | 1000000             | 46                             |                            |                                        |                              |
| M4       | Male 4          | CD4SP     | 1000000             | 53                             |                            |                                        |                              |
| F1       | Female 1        | CD4SP     | 2000000             | 30                             |                            |                                        |                              |
| F2       | Female 2        | CD4SP     | 1000000             | 38                             |                            |                                        |                              |
| F3       | Female 3        | CD4SP     | 1000000             | 48                             |                            |                                        |                              |
| F4       | Female 4        | CD4SP     | 1000000             | 65                             |                            | 79                                     | 490611.684                   |
| TS       | Turner Syndrome | CD4SP     | 1300000             | 55                             |                            |                                        |                              |
| M1       | Male 1          | CD8SP     | 1000000             | 48                             |                            |                                        |                              |
| M3       | Male 3          | CD8SP     | 1000000             | 41                             |                            |                                        |                              |
| M4       | Male 4          | CD8SP     | 1000000             | 54                             |                            |                                        |                              |
| F1       | Female 1        | CD8SP     | 660000              | 48                             |                            |                                        |                              |
| F2       | Female 2        | CD8SP     | 1000000             | 44                             |                            |                                        |                              |
| F3       | Female 3        | CD8SP     | 1000000             | 35                             |                            |                                        |                              |
| F4       | Female 4        | CD8SP     | 1000000             | 68                             |                            | 69                                     | 289248.101                   |
| TS       | Turner Syndrome | CD8SP     | 1000000             | 54                             |                            |                                        |                              |
| F1       | Female 1        | PBMC      |                     |                                | 133                        |                                        |                              |
| F2       | Female 2        | PBMC      |                     |                                | 136                        |                                        |                              |
| F3       | Female 3        | PBMC      |                     |                                | 124                        |                                        |                              |

**Supplementary Table 2:** Flow cytometry and sequencing metrics.

| Name            | Tissue details                        | Male samples (Suppl. Fig. 3b,e) | Female samples (Suppl. Fig. 3b,e) | Male samples (Suppl. Fig. 3c,d) | Female samples (Suppl. Fig. 3c,d) |
|-----------------|---------------------------------------|---------------------------------|-----------------------------------|---------------------------------|-----------------------------------|
| adipose-1       | Adipose Subcutaneous                  | 20                              | 13                                | 10                              | 10                                |
| adipose-2       | Adipose Visceral Omentum              |                                 |                                   | 10                              | 10                                |
| artery-1        | Artery Aorta                          |                                 |                                   | 10                              | 10                                |
| artery-2        | Artery Coronary                       |                                 |                                   | 10                              | 10                                |
| artery-3        | Artery Tibial                         | 43                              | 32                                | 10                              | 10                                |
| brain-1         | Brain Amygdala                        |                                 |                                   | 10                              | 10                                |
| brain-2         | Brain Anterior cingulate cortex BA24  |                                 |                                   | 10                              | 10                                |
| brain-3         | Brain Caudate basal ganglia           |                                 |                                   | 10                              | 10                                |
| brain-4         | Brain Cerebellar Hemisphere           |                                 |                                   | 10                              | 10                                |
| brain-5         | Brain Cerebellum                      |                                 |                                   | 10                              | 10                                |
| brain-6         | Brain Cortex                          | 6                               | 9                                 | 10                              | 10                                |
| brain-7         | Brain Frontal Cortex BA9              |                                 |                                   | 10                              | 10                                |
| brain-8         | Brain Hippocampus                     |                                 |                                   | 10                              | 10                                |
| brain-9         | Brain Hypothalamus                    |                                 |                                   | 10                              | 10                                |
| brain-10        | Brain Nucleus accumbens basal ganglia |                                 |                                   | 10                              | 10                                |
| brain-11        | Brain Putamen basal ganglia           |                                 |                                   | 10                              | 10                                |
| brain-12        | Brain Spinal cord cervical c1         |                                 |                                   | 10                              | 10                                |
| brain-13        | Brain Substantia nigra                |                                 |                                   | 10                              | 10                                |
| breast          | Breast Mammary Tissue                 |                                 |                                   | 10                              | 10                                |
| salivary gland  | Minor Salivary Gland                  |                                 |                                   | 10                              | 10                                |
| colon-1         | Colon Sigmoid                         |                                 |                                   | 10                              | 10                                |
| colon-2         | Colon Transverse                      |                                 |                                   | 10                              | 10                                |
| esophagus-1     | Esophagus Gastroesophageal Junction   |                                 |                                   | 10                              | 10                                |
| esophagus-2     | Esophagus Mucosa                      |                                 |                                   | 10                              | 10                                |
| esophagus-3     | Esophagus Muscularis                  |                                 |                                   | 10                              | 10                                |
| fibroblasts     | Cells Cultured fibroblasts            |                                 |                                   | 10                              | 10                                |
| heart-1         | Heart Atrial Appendage                |                                 |                                   | 10                              | 10                                |
| heart-2         | Heart Left Ventricle                  | 40                              | 22                                | 10                              | 10                                |
| kidney-1        | Kidney Cortex                         |                                 |                                   | 10                              | 10                                |
| kidney-2        | Kidney Medulla                        |                                 |                                   | 3                               | 1                                 |
| lymphocytes     | Cells EBV transformed lymphocytes     |                                 |                                   | 10                              | 10                                |
| muscle          | Muscle Skeletal                       | 53                              | 33                                | 10                              | 10                                |
| nerve           | Nerve Tibial                          | 32                              | 22                                | 10                              | 10                                |
| skin-1          | Skin Not Sun Exposed Suprapubic       |                                 |                                   | 10                              | 10                                |
| skin-2          | Skin Sun Exposed Lower leg            | 43                              | 21                                | 10                              | 10                                |
| small intestine | Small Intestine Terminal Ileum        |                                 |                                   | 10                              | 10                                |
| adrenal gland   | Adrenal Gland                         |                                 |                                   | 10                              | 10                                |
| bladder         | Bladder                               |                                 |                                   | 7                               | 7                                 |
| liver           | Liver                                 |                                 |                                   | 10                              | 10                                |
| lung            | Lung                                  | 45                              | 30                                | 10                              | 10                                |
| pancreas        | Pancreas                              |                                 |                                   | 10                              | 10                                |
| pituitary       | Pituitary                             |                                 |                                   | 10                              | 10                                |
| spleen          | Spleen                                |                                 |                                   | 10                              | 10                                |
| stomach         | Stomach                               |                                 |                                   | 10                              | 10                                |
| thymocytes      | Thymocytes                            |                                 |                                   | 3                               | 4                                 |
| thyroid         | Thyroid                               |                                 |                                   | 10                              | 10                                |
| whole blood     | Whole Blood                           | 57                              | 34                                | 10                              | 10                                |

**Supplementary Table 3:** Tissue types analysed from public data.



| Antibody                                                                  | Clone  | Cat. number                 | Dilution                                         |
|---------------------------------------------------------------------------|--------|-----------------------------|--------------------------------------------------|
| Antibodies used for sorting PBMCs and T-cell populations from buffy coats |        |                             |                                                  |
| CD3-FITC                                                                  | UCHT1  | 300418 BioLegend            | 5 $\mu$ l/10 <sup>6</sup> cells in 100 $\mu$ l   |
| CD8-APC                                                                   | RPA-T8 | 555369 Beckton Dickinson    | 20 $\mu$ l/10 <sup>6</sup> cells in 100 $\mu$ l  |
| Antibodies used for sorting of primary thymocytes with SH800              |        |                             |                                                  |
| CD4-FITC                                                                  | RPA-T4 | 555346 Beckton Dickinson    | 4 $\mu$ l/10 <sup>6</sup> cells in 100 $\mu$ l   |
| CD8-APC-H7                                                                | SK1    | 560179 Beckton Dickinson    | 1.5 $\mu$ l/10 <sup>6</sup> cells in 100 $\mu$ l |
| CD3-PE                                                                    | UCHT1  | 555333 Beckton Dickinson    | 2.5 $\mu$ l/10 <sup>6</sup> cells in 100 $\mu$ l |
| CD34-Biotin                                                               | SC136  | 130-113-177 Miltenyi Biotec | 4 $\mu$ l/10 <sup>6</sup> cells in 100 $\mu$ l   |
| CD1a-PE                                                                   | HI149  | 555807 Beckton Dickinson    | 5 $\mu$ l/10 <sup>6</sup> cells in 100 $\mu$ l   |
| Antibodies used for sorting of primary thymocytes with FACSAria Fusion    |        |                             |                                                  |
| CD4 - Per-Cy5.5                                                           | SK3    | 332772 Beckton Dickinson    | 5 $\mu$ l/10 <sup>6</sup> cells in 100 $\mu$ l   |
| CD8 - APC-H7                                                              | SK1    | 560179 Beckton Dickinson    | 2 $\mu$ l/10 <sup>6</sup> cells in 100 $\mu$ l   |
| CD3 – FITC                                                                | UCHT1  | 555332 Beckton Dickinson    | 5 $\mu$ l/10 <sup>6</sup> cells in 100 $\mu$ l   |
| CD34 - biotin                                                             | SC136  | 130-113-177 Miltenyi Biotec | 4 $\mu$ l/10 <sup>6</sup> cells in 100 $\mu$ l   |
| CD1a – PE                                                                 | HI149  | 555807 Beckton Dickinson    | 5 $\mu$ l/10 <sup>6</sup> cells in 100 $\mu$ l   |

**Supplementary Table 4:** Primary antibodies used for fluorescence-activated cell sorting.

| <b>Gene</b> | <b>Probe ID</b> |
|-------------|-----------------|
| CD99        | Hs00908455_m1   |
| CD40LG      | Hs00163934_m1   |
| DDX3X       | Hs00606179_m1   |
| EPAS1       | Hs01026149_m1   |
| KDM6A       | Hs00253500_m1   |
| P2RY8       | Hs00736776_m1   |
| USP9X       | Hs00245009_m1   |
| VAMP7       | Hs00194568_m1   |
| XIST        | Hs01079824_m1   |
| XIST        | Hs03455388_s1   |
| XIST        | Hs01077162_m1   |

**Supplementary Table 5:** qPCR probes used.

| <b>Primer</b> | <b>Sequence (5' – 3')</b> |
|---------------|---------------------------|
| AR_forward    | ACCGAGGAGCTTTCCAGAAT      |
| AR_reverse    | GCTGCCTGGGGCTAGTCTCTT     |
| RP2_forward   | TGACATAGCGAGACCCTGTG      |
| RP2_reverse   | TGGTGGGTTCTCTAGCTGG       |

**Supplementary Table 6:** Oligonucleotides used in HUMARA assay and X-chromosome repeat amplification.
